# Supplementary material for: Proteomic Changes in Response to Colorless nonripening Mutation during Tomato Fruit Ripening
Source: MDPI journal article supplement (doi:10.3390/plants11243570), 2022-12-17
Supplement: s1 [file s1]

## Supplementary Materials

**Table S1.** The information of all identified proteins acquired by iTRAQ in AC and *Cnr* fruits.

Accession: the accession number of non-redundant protein database of NCBI; Expt. Mr: Experimental molecular mass; Coverage: Amino acid sequence coverage for the identified proteins; Sequence: The sequence information of identified peptides; Score: Mascot scores are statistically significant ( $p < 0.05$ ); COG: Clusters of Orthologous Groups of proteins; KEGG: The Kyoto Encyclopedia of Genes and Genomes; EC: Enzyme Commission; GO: Gene Ontology.

**Table S2.** The information of DEPs between AC and *Cnr* fruits at the breaker stage.

Accession: the accession number of non-redundant protein database of NCBI; Expt. Mr: Experimental molecular mass; Coverage: Amino acid sequence coverage for the identified proteins; Sequence: The sequence information of identified peptides; Score: Mascot scores are statistically significant ( $p < 0.05$ ); COG: Clusters of Orthologous Groups of proteins; KEGG: The Kyoto Encyclopedia of Genes and Genomes; EC: Enzyme Commission; GO: Gene Ontology. The green or orange background indicates that the DEPs were down or up-regulated respectively in *Cnr* fruit.

**Table S3.** The information of DEPs between AC and *Cnr* fruits at 10 DPB stage.

Accession: the accession number of non-redundant protein database of NCBI; Expt. Mr: Experimental molecular mass; Coverage: Amino acid sequence coverage for the identified

proteins; Sequence: The sequence information of identified peptides; Score: Mascot scores are statistically significant ( $p < 0.05$ ); COG: Clusters of Orthologous Groups of proteins; KEGG: The Kyoto Encyclopedia of Genes and Genomes; EC: Enzyme Commission; GO: Gene Ontology. The green or orange background indicates that the DEPs were down or up-regulated respectively in *Cnr* fruit.

**Table S4.** The information of overlap DEPs between AC and *Cnr* fruits at the breaker and 10 DPB stages.

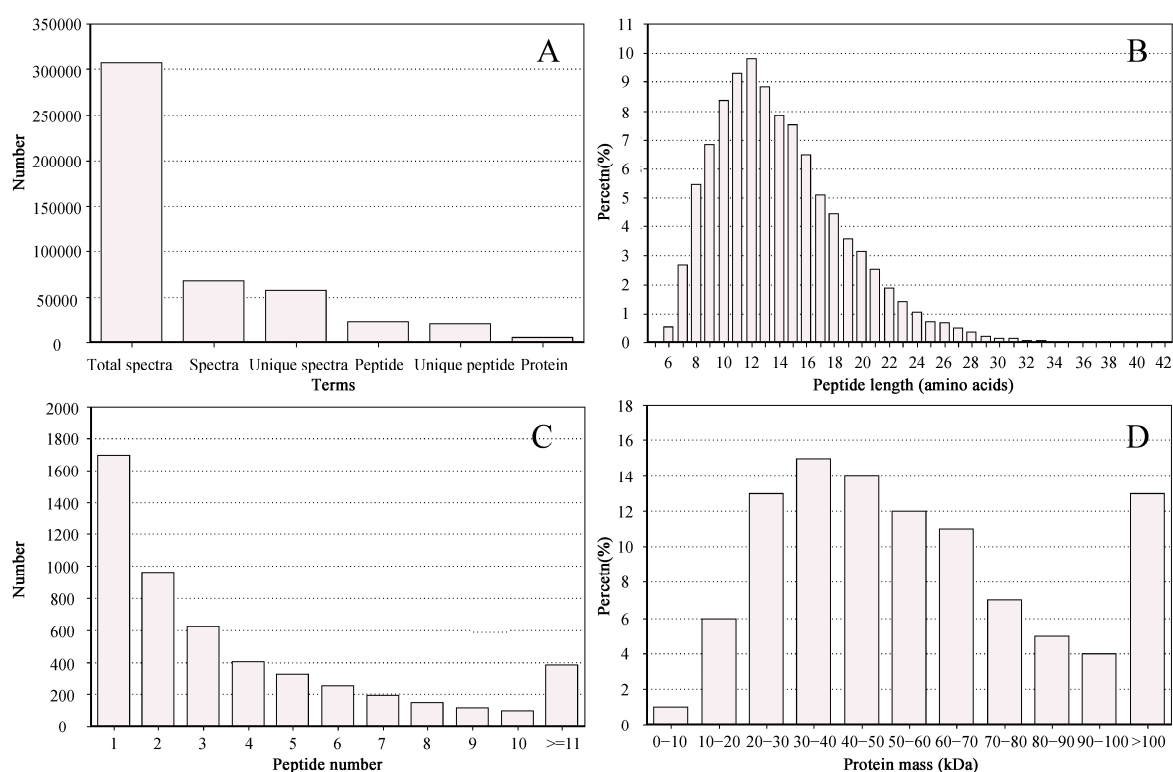

**Figure S1** The basic information (A), peptide length distribution (B), peptide number distribution (C), protein mass distribution (D) of total proteins identified by iTRAQ in AC and *Cnr* fruits at different ripening stages.

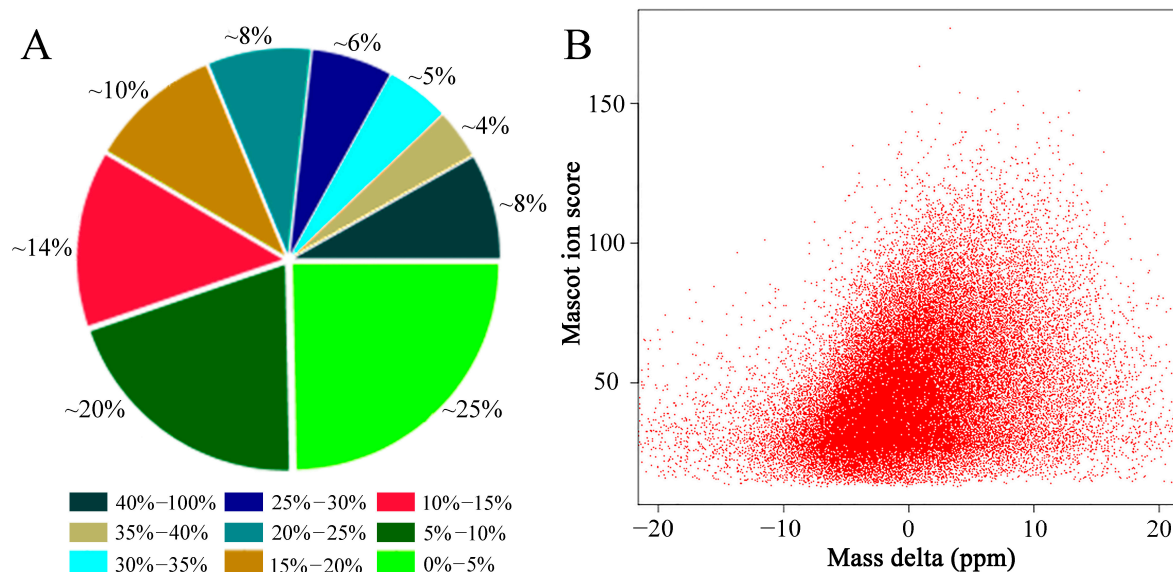

**Figure S2** The distribution of protein's sequences coverage (A) and mass error of peptide spectrum matches (B).

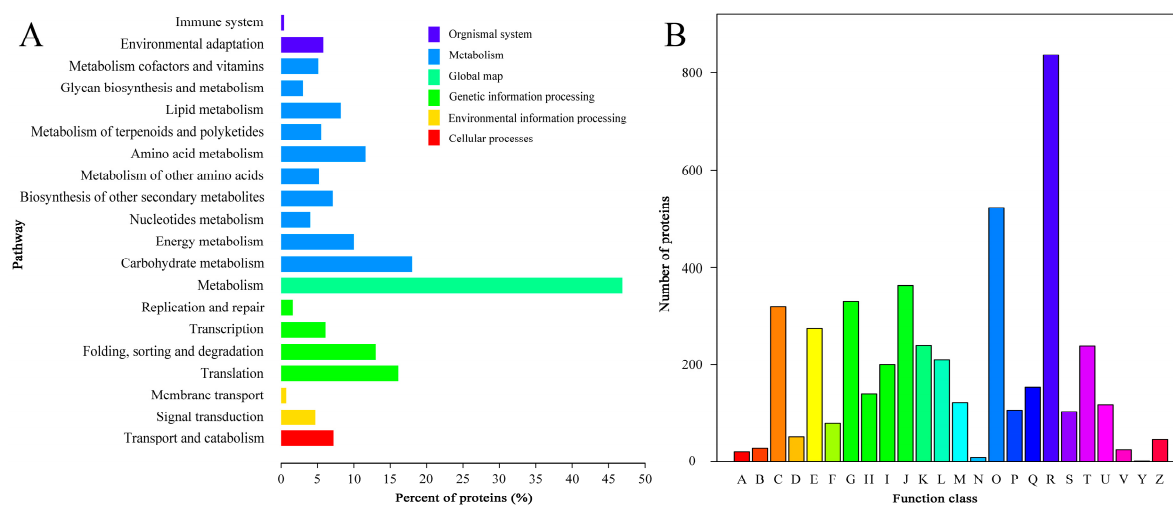

**Figure S3** KEGG pathway classification (A) and COG function classification (B) of all identified proteins acquired by iTRAQ. COG function classification are as follows. Function class FC-A: RNA processing and modification; FC-B: chromatin structure and dynamics; FC-C: energy production and conversion; FC-D: cell cycle control, cell division, chromosome partitioning; FC-E: amino acid transport and metabolism; FC-F: nucleotide

transport and metabolism; FC-G: carbohydrate transport and metabolism; FC-H: coenzyme transport and metabolism; FC-I: lipid transport and metabolism; FC-J: translation, ribosomal structure and biogenesis; FC-K: transcription; FC-L: replication, recombination and repair; FC-M: cell wall/membrane/envelope biogenesis; FC-N: cell motility; FC-O: post-translational modification, protein turnover, chaperones; FC-P: inorganic ion transport and metabolism; FC-Q: secondary metabolites biosynthesis, transport and catabolism; FC-R: general function prediction only; FC-S: function unknown; FC-T: signal transduction mechanism; FC-U: intracellular trafficking, secretion, and vesicular transport; FC-V: defense mechanisms; FC-Y: nuclear structure; FC-Z: cytoskeleton.
